# Supplementary material for: Crystal structure of the N-myristoylated lipopeptide-bound MHC class I complex
Source: Nat Commun. 2016 Jan 13;7:10356. doi: 10.1038/ncomms10356 (PMC4735555; doi:10.1038/ncomms10356)
Supplement: Supplementary Information — Supplementary Figures 1-5 and Supplementary Table 1. [file ncomms10356-s1.pdf]

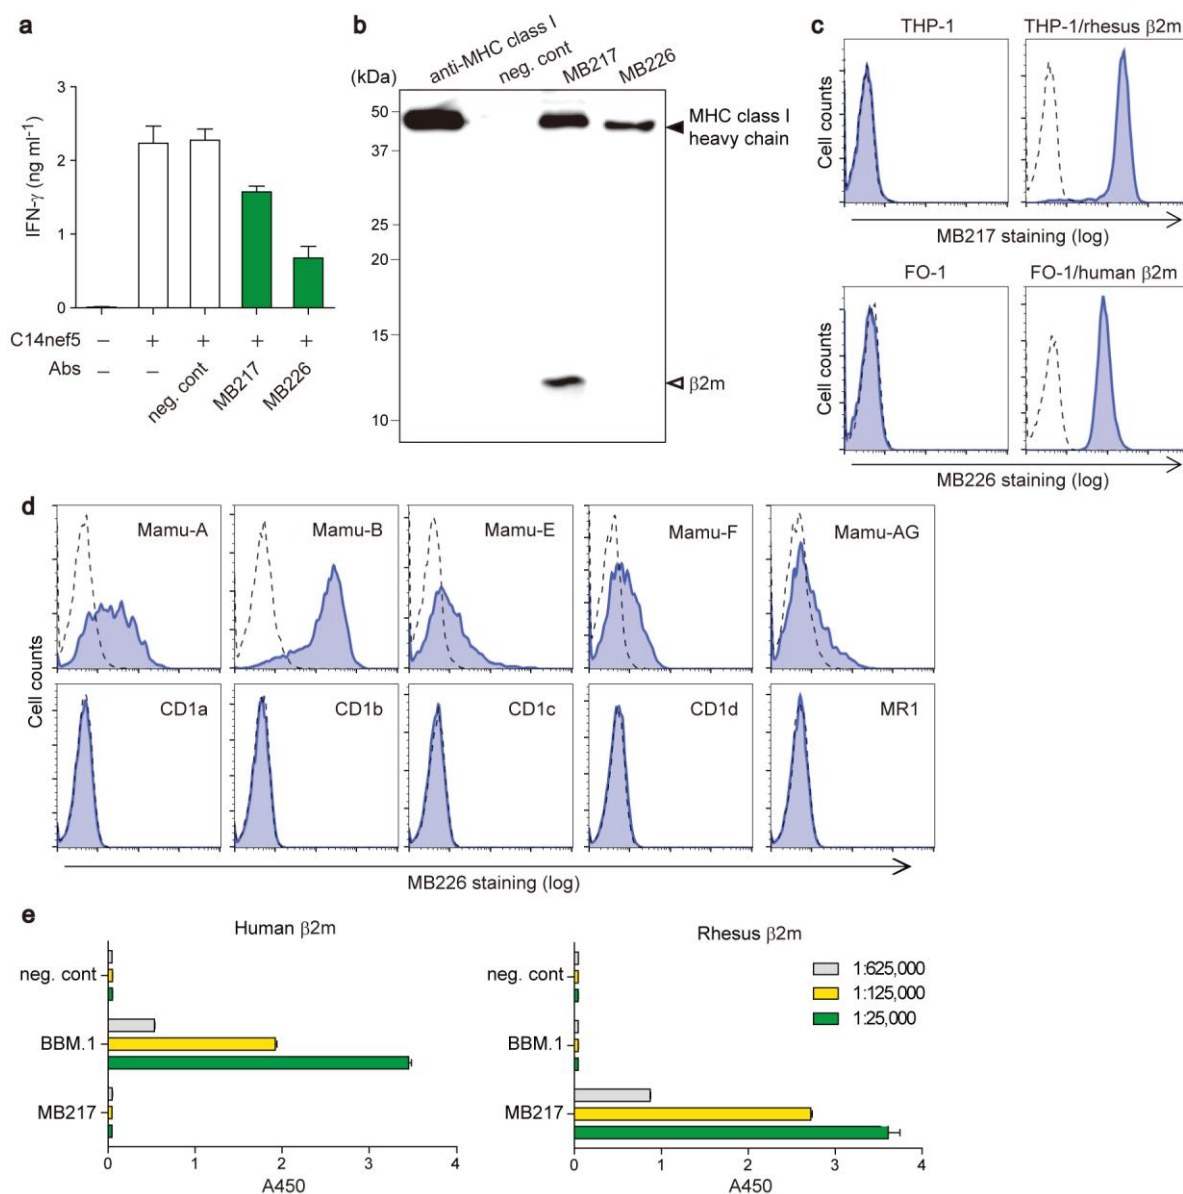

**Supplementary Figure 1. Involvement of an MHC class I molecule in lipopeptide Ag-presentation.**

**a**, 2N5.1 cells responded to C14nef5 to produce IFN- $\gamma$  in the presence of rhesus PBMCs derived from a positive donor, and the Ag-specific response was blocked by MB217 and MB226 mAbs (at a 1:400 dilution of ascites). **b**, Surface biotinylated LLC-MK2 cells were lysed in 0.5% Triton X-100, and immunoprecipitation was performed with the indicated mAbs. The 45 kDa species (MHC class I heavy chains) and 12 kDa species ( $\beta$ 2m) immunoprecipitated by the Abs were indicated. **c**, MB217 failed to recognize the human monocytic cell line, THP-1, but reacted to rhesus  $\beta$ 2m-transfected THP-1 cells (upper panels). MB226 failed to recognize the human  $\beta$ 2m-deficient cell line, FO-1, but reacted to human  $\beta$ 2m-reconstituted FO-1 cells (lower panels), indicating that MB226 cross-reacted to human

MHC class I molecules. Dotted lines indicate histograms with a negative control mAb. **d**, The mouse melanoma cell line, B16F10, was transfected transiently with the indicated genes, labeled with the MB226 mAb, and analyzed by flow cytometry. **e**, The reactivity of serially diluted MB217 ascites to plate-coated human (left) and rhesus (right)  $\beta 2m$  was tested by ELISA. The reciprocal recognition of human and rhesus  $\beta 2m$  by BBM.1 and MB217 was demonstrated. Experiments were performed in triplicate, and mean values with SEM are shown.

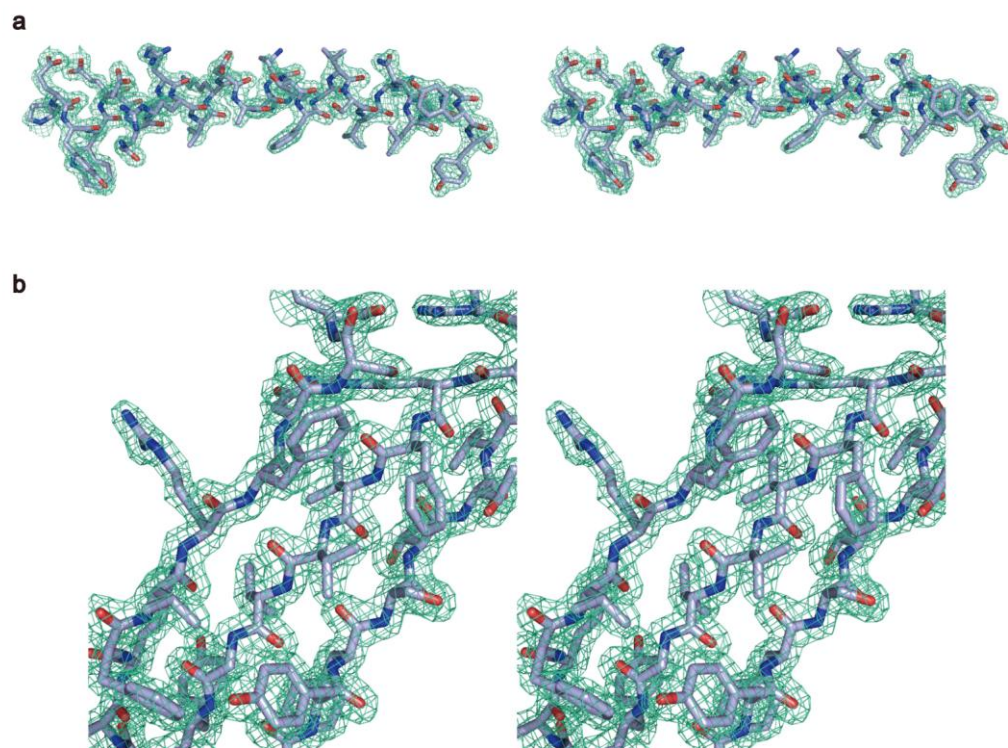

**Supplementary Figure 2. Stereo images of a portion of the electron density map.** Stereo views of  $\alpha 1$  helix from Pro75 to Tyr85 (a) and  $\beta$ -sheets from Gly1 to Asp39 (b) of Mamu-B\*098 with a 2Fo-Fc map (green mesh) contoured at  $1.6\sigma$ .

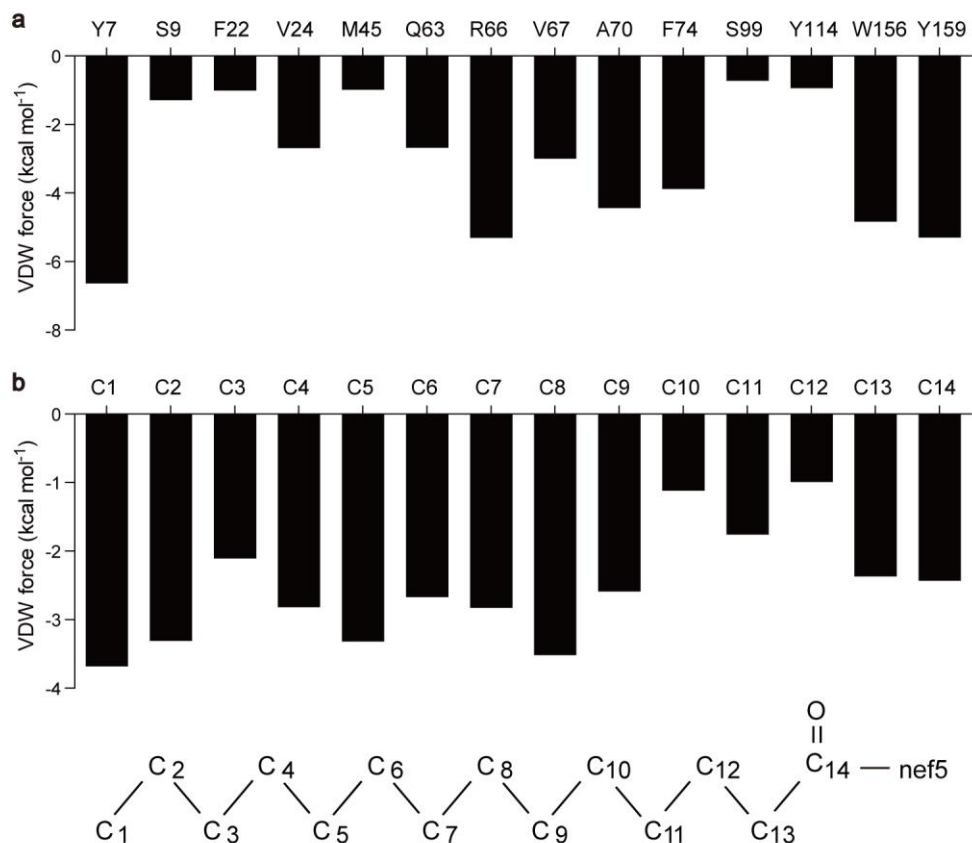

**Supplementary Figure 3. VDW forces established between Mamu-B\*098 and the acyl chain of C14nef5.** The VDW forces involved in accommodation of the acyl chain were calculated for each amino acid residue of Mamu-B\*098 (**a**) and for individual carbons of the acyl chain (**b**) by a fragment molecular orbital (FMO) method using the PAICS program. Only the amino acid residues of Mamu-B\*098 with delta energy below the level of -0.5 kcal/mol are shown in **a**.

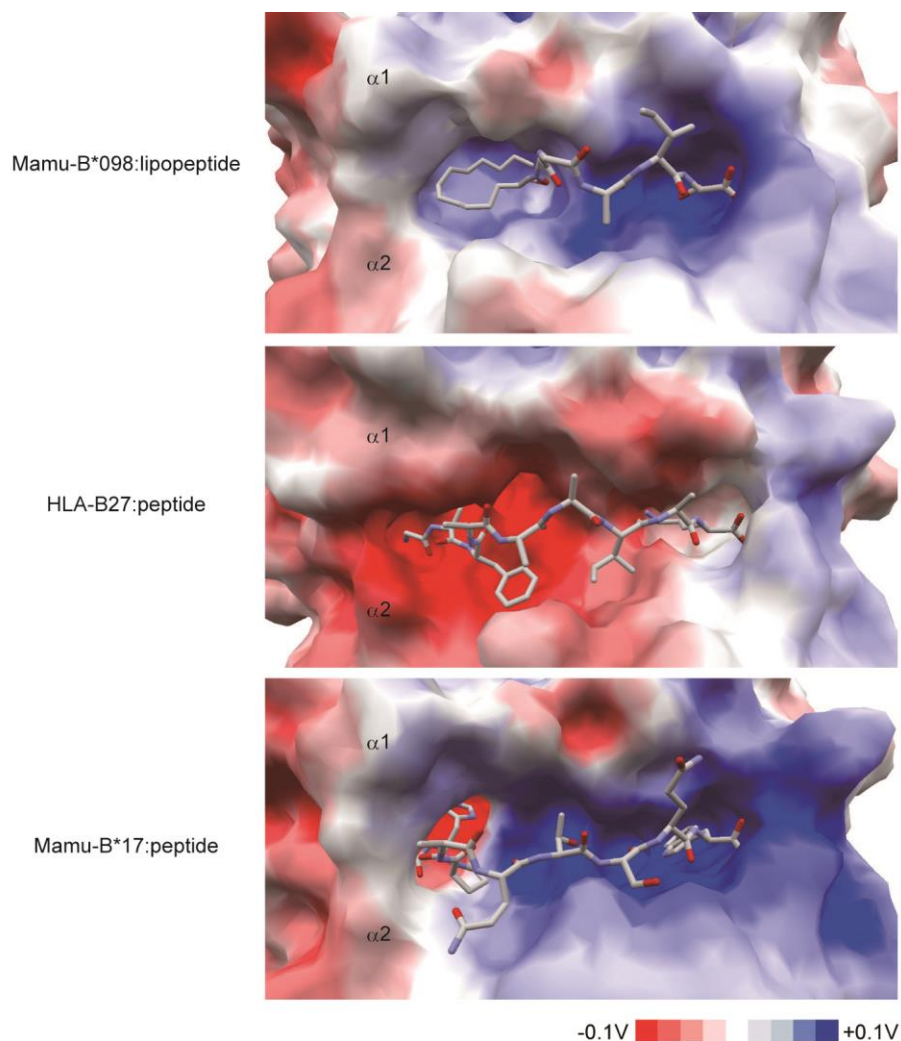

**Supplementary Figure 4. Surface electrostatic potential of Mamu-B\*098, HLA-B27, and Mamu-B\*17.** Surface electrostatic potentials of the Ag-binding groove are shown for Mamu-B\*098, HLA-B27, and Mamu-B\*17. Note the low electrostatic potential in the area involved in interactions with the acyl chain (top), which contrasted sharply with the high electrostatic potential detected in HLA-B27 (middle) and Mamu-B\*17 (bottom).

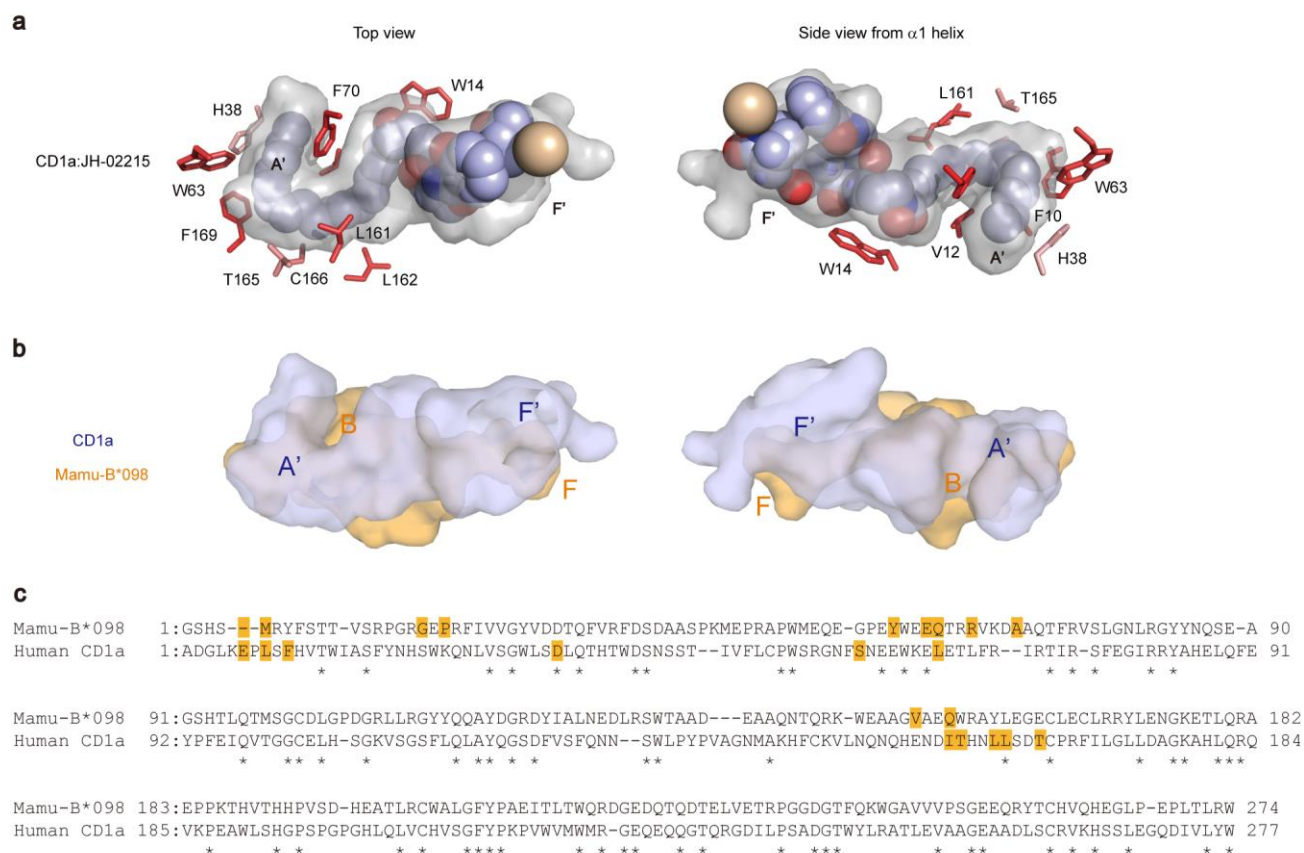

**Supplementary Figure 5. Interactions of the mycobactin-like lipopeptide, JH-02215, with human CD1a.** **a**, JH-02215 is shown in blue as a space-filling model with the semi-transparent Ag-binding groove of human CD1a molecules (PDB code 1XZ0). The side chains of amino acid residues contributing to C-C contacts with the lipid portion of JH-02115 are shown in red. As in Fig. 3a, the intensity of the red color correlates with the degree of hydrophobicity. **b**, Superimposed images of Ag-binding pockets of human CD1a (blue) and Mamu-B\*098 (orange) are shown. **c**, A ProbCons sequence alignment of Mamu-B\*098 and human CD1a is displayed. The amino acid residues contributing to the C-C contacts are highlighted in orange. Asterisks indicate amino acid residues that are shared between the two molecules.

**Supplementary Table 1.** Contacts between C14nef5 and Mamu-B\*098

| C14nef5         | Hydrogen bonds |            |              | C-C contacts                                                                      |
|-----------------|----------------|------------|--------------|-----------------------------------------------------------------------------------|
|                 | Atom           | Partner    | Distance (Å) |                                                                                   |
| Myristoyl group | O1             | Y114 (OH)  | 3.1          | Y7, S9, F22, V24, Q63, R66, V67, A70, F74, W156, Y159, 10 intrachain interactions |
| Gly1            | O              | Water384   | 3.1          | None                                                                              |
|                 |                | D69 (OD2)  | 2.9          |                                                                                   |
|                 |                | T73 (OG1)  | 2.7          |                                                                                   |
| Gly2            |                | None       |              | T73                                                                               |
| Ala3            | O              | Water139   | 3.0          | T73, W147, V152                                                                   |
| Ile4            | O              | Water384   | 3.3          | T73, V76, S 77, N80                                                               |
|                 |                | W147 (NE1) | 2.9          |                                                                                   |
| Ser5            | N              | S77 (OG)   | 3.0          | S77, L81, Y84, T143, K146, W147                                                   |
|                 | OG             | Q116 (OE1) |              |                                                                                   |
|                 | O              | Water139   | 2.8          |                                                                                   |
|                 |                | Y84 (OH)   | 2.7          |                                                                                   |
|                 |                | T143 (OG1) | 2.7          |                                                                                   |
|                 |                | N80 (ND2)  | 2.9          |                                                                                   |
|                 | OXT            | Y84 (OH)   | 3.3          |                                                                                   |
|                 |                | K146 (NZ)  | 2.9          |                                                                                   |
|                 |                |            |              |                                                                                   |

\* Contacts were assigned using a cut-off of 3.4 Å for hydrogen bond interactions and 4.4 Å for C-C interactions.
